# Supplementary material for: Circular waste valorization: humic acid adsorption onto ZnS nanoparticle-loaded biomass and conversion into nutrient-rich alginate beads
Source: Royal Society of Chemistry journal article supplement (doi:10.1039/d6ra00928j), 2026-05-01
Supplement: d6ra00928j1.pdf [file d6ra00928j1.pdf]

## Circular Waste Valorization: Humic Acid Adsorption onto ZnS Nanoparticle-Loaded Biomass and Conversion into Nutrient-Rich Alginate Beads

J. Balaji<sup>1</sup> and R. Lakshmiathy<sup>1,2\*</sup>

### Supplemental file

Figures

#### From the TGA Graph:

Biomass residue  $R_b = 47.4\%$

ZnS–biomass residue  $R_c = 48.4\%$

$$\text{ZnS wt\%} = \frac{R_b - R_c}{100 - R_b} \times 100$$

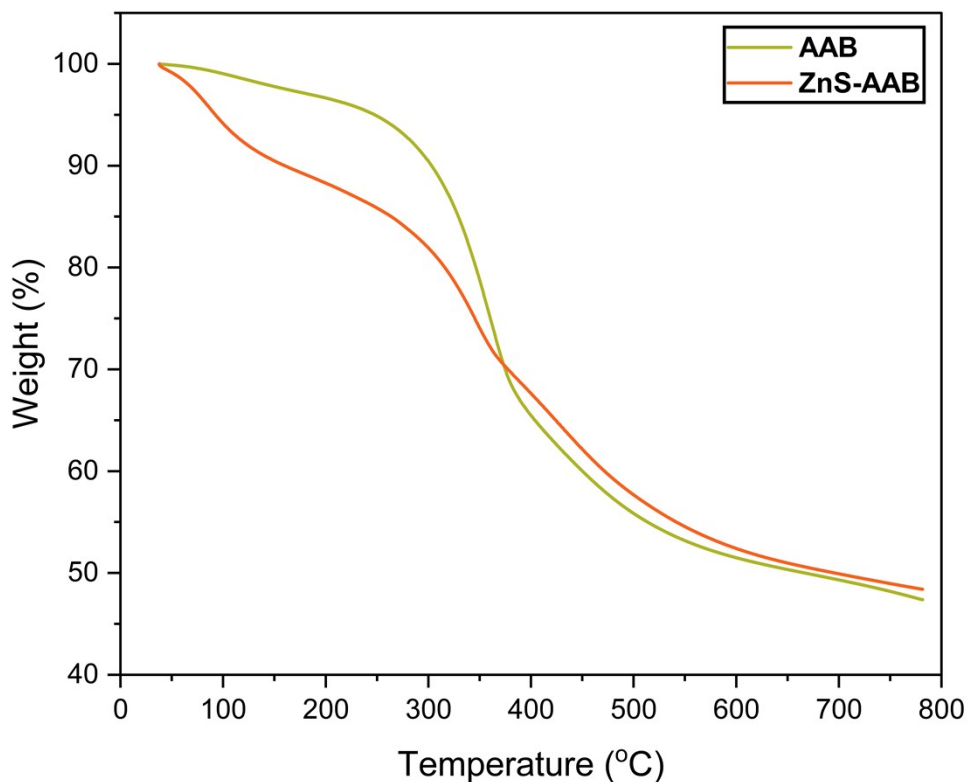

$$= \frac{48.4 - 47.4}{100 - 47.4} \times 100 = \frac{1.0}{52.6} \times 100 = 1.9\%$$

Fig.S1 TGA analysis of ZnS loading onto the acid activated biomass

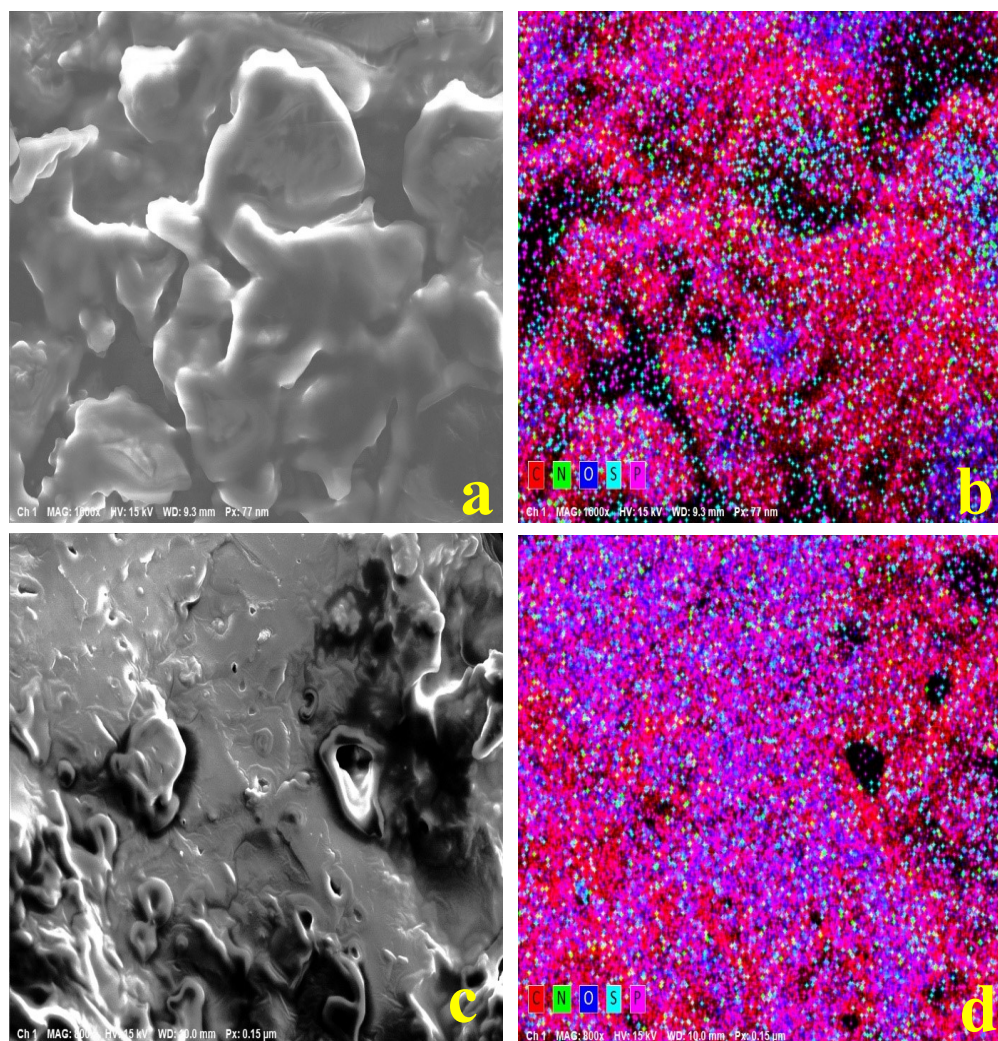

Fig. S2 EDX with elemental mapping of (a) and (b) pristine biomass, (c) and (d) AAB

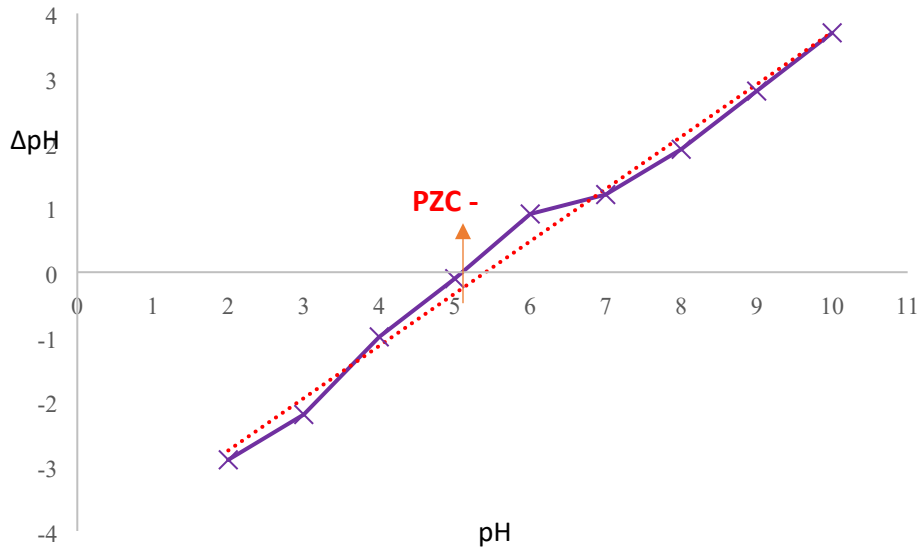

Fig. S3 Point Zero Charge of ZnS-AAB

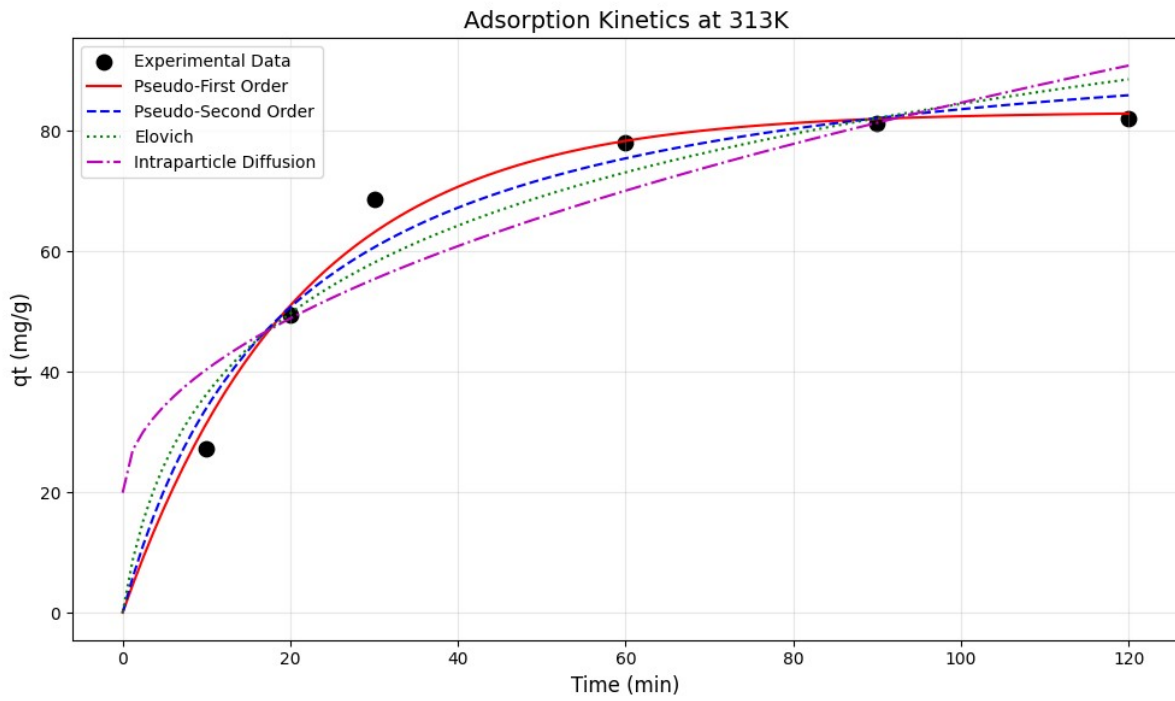

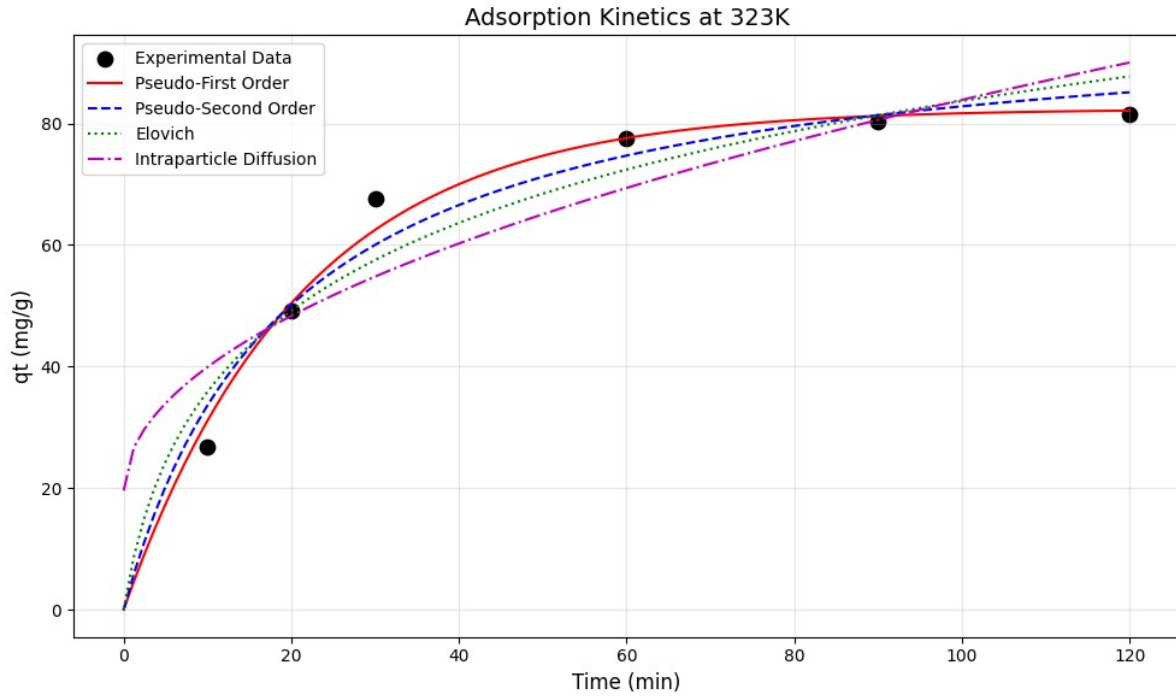

Fig.S4 Kinetic plots obtained for the removal of HA by ZnS-AAB at 313 and 323 K

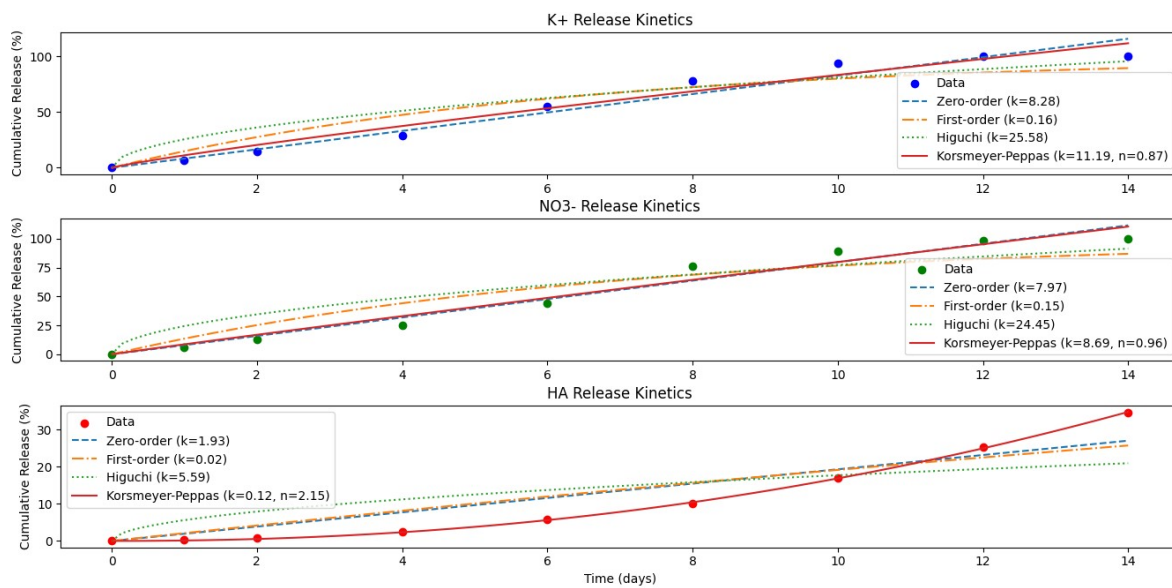

Fig. S5 Kinetic plots obtained for the nutrients release from HA loaded ZnS-AAB alginate composite beads

Table S1 Dimensionless separation factor ( $R_L$ ) for various concentrations of HA

| Initial Concentration | $R_L$ Values |
|-----------------------|--------------|
| 50                    | 0.465116     |
| 100                   | 0.30303      |
| 150                   | 0.224719     |
| 200                   | 0.178571     |
| 250                   | 0.148148     |
| 300                   | 0.126582     |

Table-S2 Kinetic constants obtained for the removal of HA by ZnS-AAB at 313K (Concentration 50 mg L<sup>-1</sup>)

| Model               | Constants                                             | Value  | RMSE | AARE (%) |
|---------------------|-------------------------------------------------------|--------|------|----------|
| Pseudo first order  | $q_e$ (mg g <sup>-1</sup> )                           | 82.8   | 3.45 | 4.38     |
|                     | $k_1$ (min <sup>-1</sup> )                            | 0.047  |      |          |
|                     | $R^2$                                                 | 0.983  |      |          |
| Pseudo second order | $q_e$ (mg g <sup>-1</sup> )                           | 84.5   | 1.12 | 1.45     |
|                     | $k_2$ (mg.g <sup>-1</sup> min <sup>-1</sup> )         | 0.0013 |      |          |
|                     | $R^2$                                                 | 0.997  |      |          |
| Elovich             | $\alpha$ (mg. (g.min) <sup>-1</sup> )                 | 2.52   | 2.45 | 3.12     |
|                     | $\beta$ (g mg <sup>-1</sup> )                         | 0.085  |      |          |
|                     | $R^2$                                                 | 0.991  |      |          |
| Intraparticle       | $k_{id}$ (mg. (g.min <sup>0.5</sup> ) <sup>-1</sup> ) | 6.28   | 5.89 | 7.78     |
|                     | $C$ (mg g <sup>-1</sup> )                             | 17.8   |      |          |
|                     | $R^2$                                                 | 0.931  |      |          |

Table-S3 Kinetic constants obtained for the removal of HA by ZnS-AAB at 323K  
(Concentration 50 mg L<sup>-1</sup>)

| Model               | Constants                                             | Value  | RMSE | AARE (%) |
|---------------------|-------------------------------------------------------|--------|------|----------|
| Pseudo first order  | $q_e$ (mg g <sup>-1</sup> )                           | 82.1   | 3.67 | 4.72     |
|                     | $k_1$ (min <sup>-1</sup> )                            | 0.049  |      |          |
|                     | $R^2$                                                 | 0.981  |      |          |
| Pseudo second order | $q_e$ (mg g <sup>-1</sup> )                           | 83.9   | 1.28 | 1.67     |
|                     | $k_2$ (mg.g <sup>-1</sup> min <sup>-1</sup> )         | 0.0014 |      |          |
|                     | $R^2$                                                 | 0.996  |      |          |
| Elovich             | $\alpha$ (mg. (g.min) <sup>-1</sup> )                 | 2.61   | 2.67 | 3.45     |
|                     | $\beta$ (g mg <sup>-1</sup> )                         | 0.082  |      |          |
|                     | $R^2$                                                 | 0.989  |      |          |
| Intraparticle       | $k_{id}$ (mg. (g.min <sup>0.5</sup> ) <sup>-1</sup> ) | 6.15   | 6.12 | 8.23     |
|                     | $C$ (mg g <sup>-1</sup> )                             | 17.3   |      |          |
|                     | $R^2$                                                 | 0.927  |      |          |
